# Supplementary material
Source: publisher site journal article supplement (https://kjim.org/upload/media/kjim-2023-311-Supplementary-Fig-2.pdf)
Supplement: Supplementary file 1 [file kjim-2023-311-Supplementary-Fig-2.pdf]

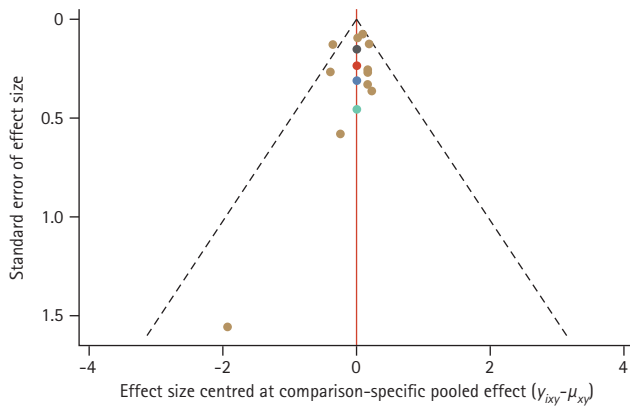

**A** ● BSV vs ETV ● BSV vs TAF ● BSV vs TDF ● ETV vs TDF ● TAF vs TDF

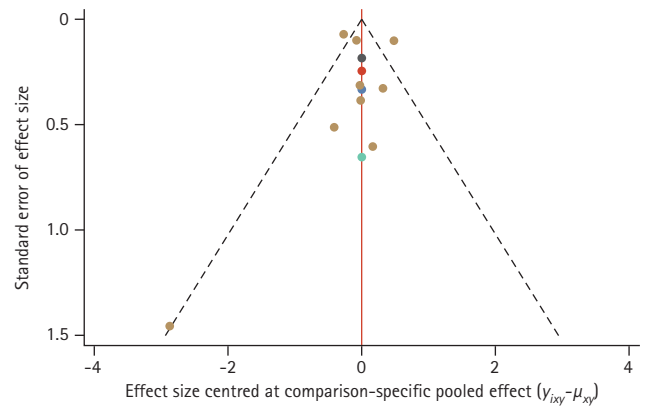

**B** ● BSV vs ETV ● BSV vs TAF ● BSV vs TDF ● ETV vs TDF ● TAF vs TDF

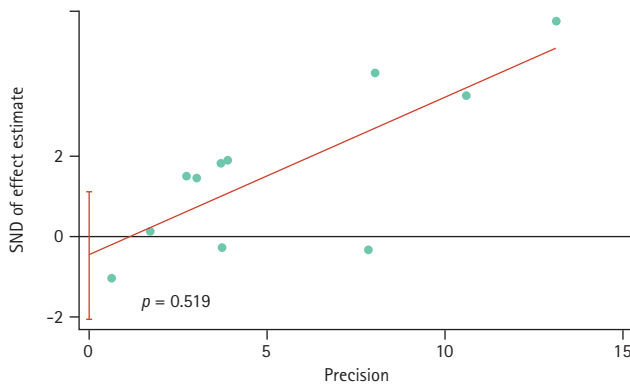

**C** ● Study — Regression line — 95% CI for intercept

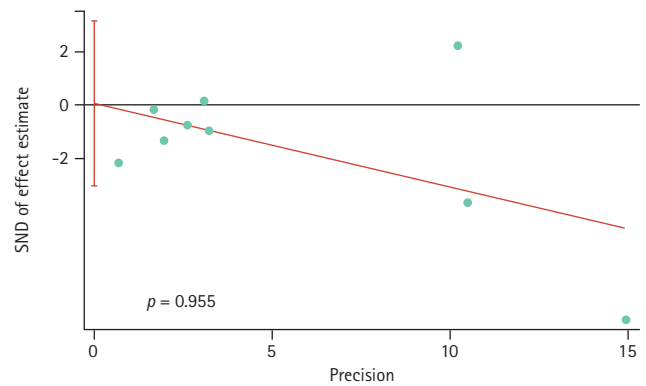

**D** ● Study — Regression line — 95% CI for intercept

**Supplementary Figure 2.** Publication bias depicted in funnel plot regarding (A) 48VR and (B) 48BR and Regression line of Egger's test regarding (C) 48VR and (D) 48BR. 48VR, 48-week virologic response; 48BR, 48-week biochemical response, BSV, besifovir dipivoxil maleate; ETV, entecavir; TAF, tenofovir alafenamide; TDF, tenofovir disoproxil fumarate; SND, standard normal deviate; CI, confidence interval.
